# Supplementary material for: Theoretical analysis of electron transport in perovskite thin films
Source: Royal Society of Chemistry journal article supplement (doi:10.1039/d4cp03281k), 2024-01-01
Supplement: d4cp03281k1.pdf [file d4cp03281k1.pdf]

## Supplementary Information

# Theoretical Analysis of Electron Transport in Perovskite Thin Films

*Ankur Bhaumik\* and Anshu Pandey*

Author Address

Solid State and Structural Chemistry Unit, Indian Institute of Science, Bangalore 560012, India

\*Correspondence to

E-mail: [bhaumikankur01@gmail.com](mailto:bhaumikankur01@gmail.com)

## 1) Explanation for the choice of width of energy disorder (W)

Mosconi et. al.<sup>34</sup> determined that in MAPbI<sub>3</sub>, shallow potential wells of the order of 100 to 200 meV exist. This means that the sites involved in transport have their energies lying within a range of  $W=100$  meV (see **Figure S1**). In our study we perform simulations for  $W=69$  meV (main text) and  $W=100$  meV (SI). Both are of the same order and therefore lead to similar results.

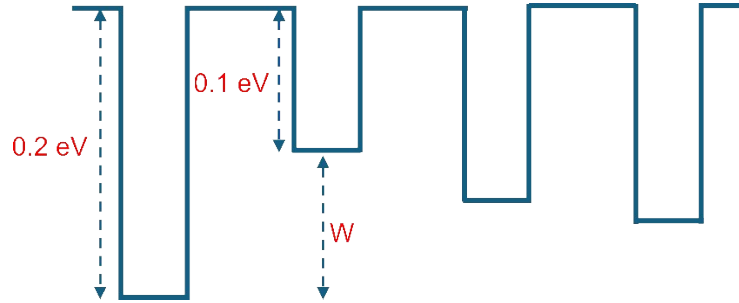

**Figure S1:** Schematic to explain the choice of width of the disorder.

## 2) Result of Temperature Dependent Study with $W = 100$ meV

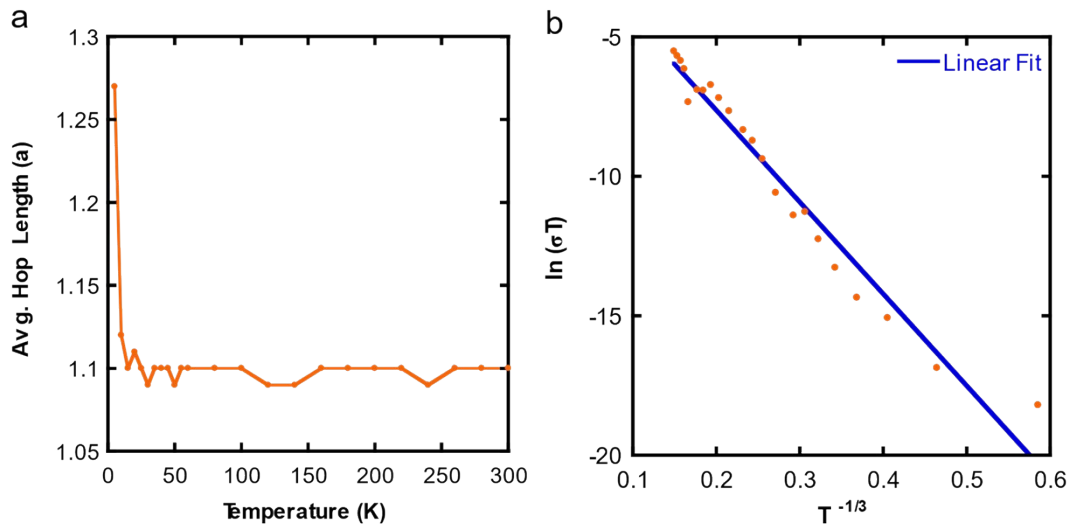

**Figure S2:** **(a)** Average Hopping Length as a function of Temperature **(b)**  $\ln(\sigma T)$  vs  $T^{-1/3}$

From the fit (**figure S2b**) one gets,

$$T_o = 35.74 \times 10^3 \text{ K and } \alpha_2 = 7.7$$

Thus, similar effects are observed for both  $W = 69$  and  $W = 100$  meV

### 3) Result of Temperature Dependent Study with $W=100$ meV

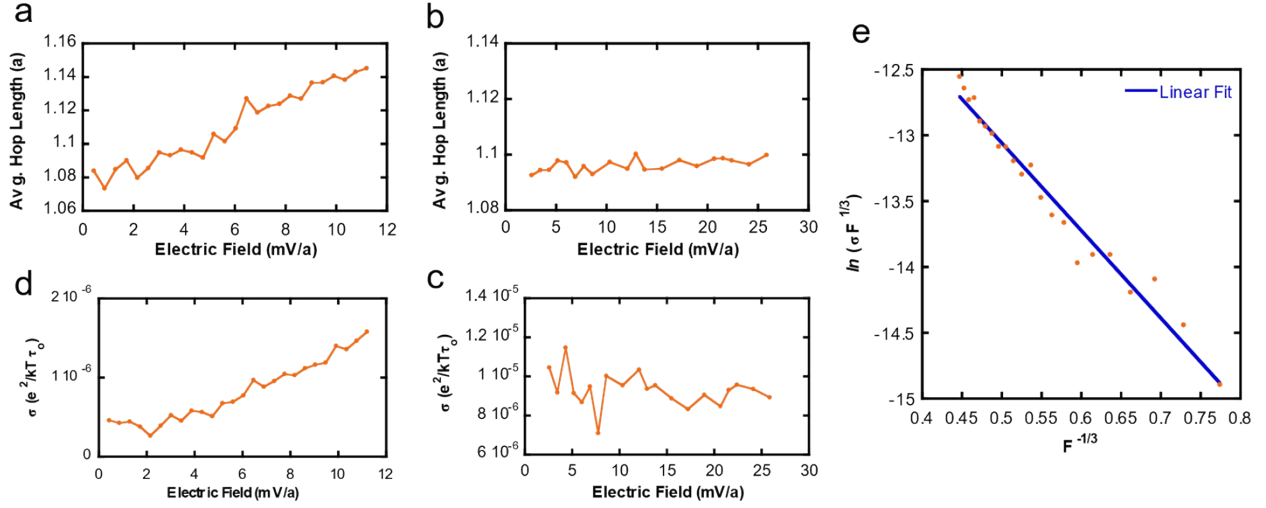

**Figure S3:** (a) Average hopping length as a function of Electric Field at 40 K (b) Average hopping length as a function of Electric Field at 300 K (c) Conductivity as a function of Electric Field ( $F$ ) at 40 K (d) Conductivity as a function of Electric Field ( $F$ ) at 300 K (e)  $\log(\sigma F^{1/3})$  vs  $(F^{-1/3})$  at 40 K. The blue line is a linear fit.

Thus, similar effects are observed for both  $W = 69$  and  $W = 100$  meV
